# Supplementary material for: Hind-Casting the Quantity and Composition of Discards by Mixed Demersal Fisheries in the North Sea
Source: PLOS journal article supplement (doi:10.1371/journal.pone.0117078), 2015-03-16
Supplement: S6 (10.1371/journal.pone.0117078.s006) [file journal.pone.0117078.s006]

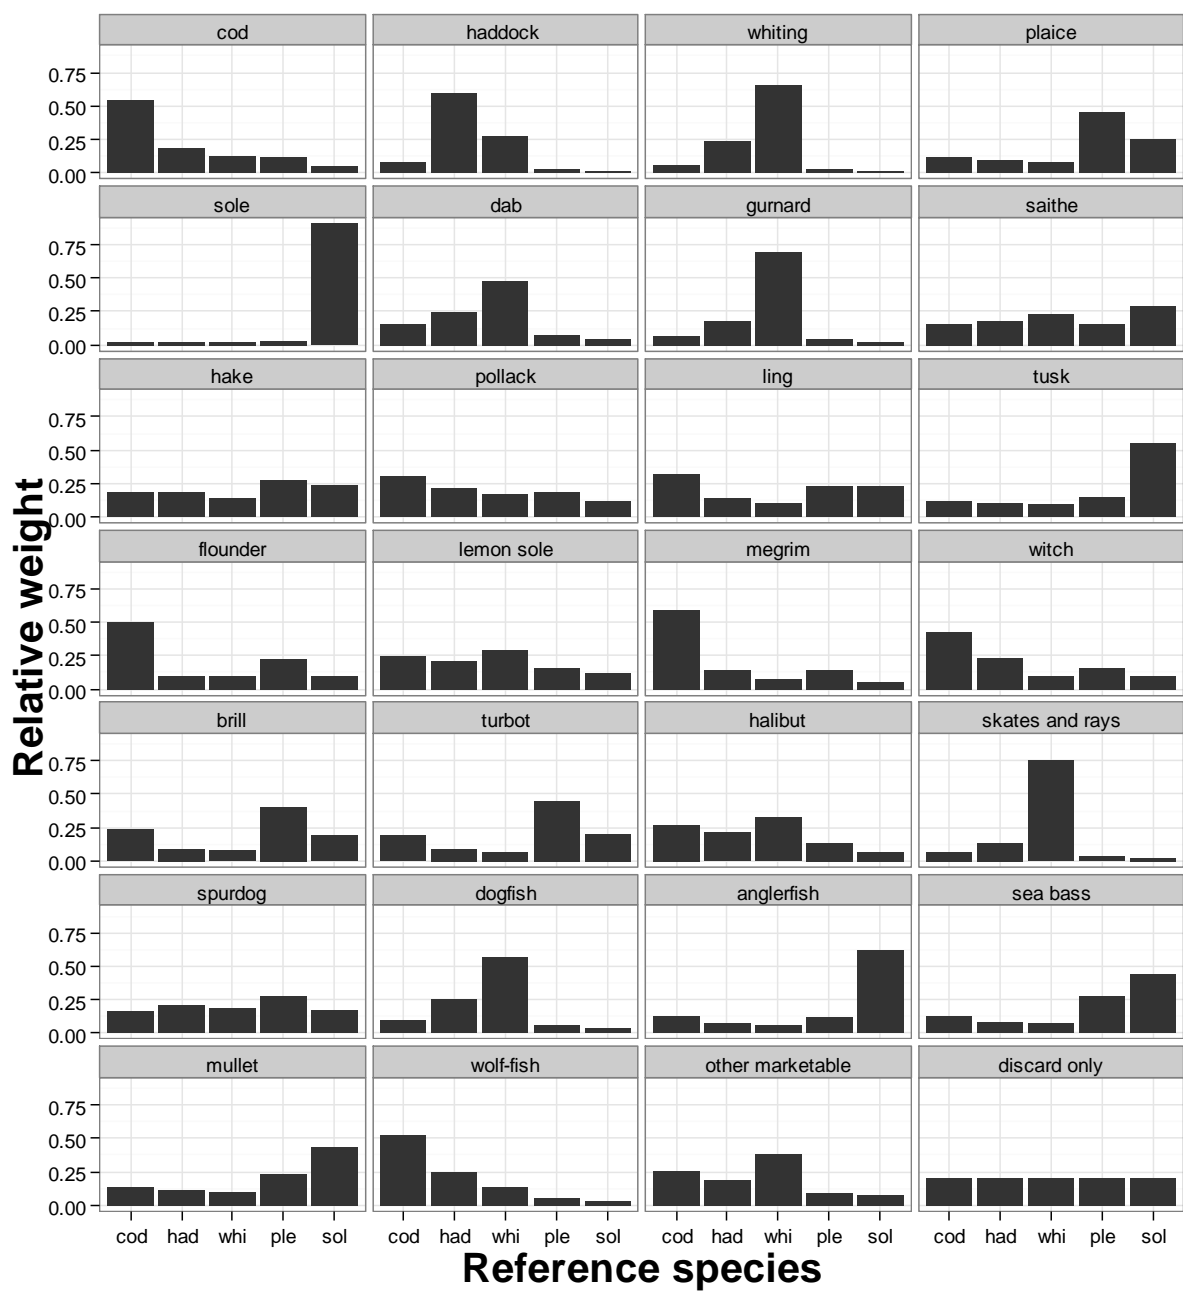

**Figure S5. Weights assigned to reference species catch ratios in order to derive a raising factor for each non-reference species.** Values for cod, haddock, whiting, plaice and sole (x-axis: cod, had, whi, ple, sol) are the estimates arising from the cross-validation analysis.
