# Supplementary material for: Hind-Casting the Quantity and Composition of Discards by Mixed Demersal Fisheries in the North Sea
Source: PLOS journal article supplement (doi:10.1371/journal.pone.0117078), 2015-03-16
Supplement: S9 (10.1371/journal.pone.0117078.s009) [file journal.pone.0117078.s009]

**TABLE S3.** Literature sourced data on discard rates of species other than the reference set --cod, haddock, whiting and plaice - in the North Sea.

| Species     | Years                                                                                                      | Proportion discarded by weight                                                                             | Source                                                              | Reference |
|-------------|------------------------------------------------------------------------------------------------------------|------------------------------------------------------------------------------------------------------------|---------------------------------------------------------------------|-----------|
| Anglerfish  | 1999 – 2007                                                                                                | 0.140                                                                                                      | England & Wales TRIO observer database                              | [1]       |
| Anglerfish  | 2010                                                                                                       | 0.003                                                                                                      | Denmark, North Sea & Skagerrak, observer data                       | [2]       |
| Anglerfish  | 2005-2007                                                                                                  | 0.021                                                                                                      | Summary for beam trawl fisheries                                    | [3]       |
| Anglerfish  | 2002-2008                                                                                                  | 0.003 (otter trawl)                                                                                        | Germany, observer data                                              | [4]       |
| Bass        | 2000's                                                                                                     | 0                                                                                                          | Summary by WG                                                       | [5]       |
| Brill       | 2010                                                                                                       | 0.007                                                                                                      | Denmark, North Sea & Skagerrak, observer data                       | [2]       |
| Brill       | 2005-2007                                                                                                  | 0.012                                                                                                      | Summary for beam trawl fisheries                                    | [3]       |
| Brill       | 2002-2008                                                                                                  | 0.019 (beam trawl); 0.141 (otter trawl)                                                                    | Germany, observer data                                              | [4]       |
| Common dab  | 1999 – 2007                                                                                                | 0.969                                                                                                      | England & Wales TRIO observer database                              | [1]       |
| Common dab  | 2007, 2008                                                                                                 | 0.96, 0.95                                                                                                 | Netherlands observer database                                       | [6]       |
| Common dab  | 2007-2009                                                                                                  | 0.67, 0.95, 0.97 (otter trawl); 0.99, 0.96, 0.95 (beam trawl)                                              | Germany, observer data, otter trawl and beam trawl                  | [5]       |
| Common dab  | 2003 – 2006                                                                                                | 0.89 (by numbers)                                                                                          | England & Wales observer data                                       | [7]       |
| Common dab  | 2010                                                                                                       | 0.285                                                                                                      | Denmark, North Sea & Skagerrak, observer data                       | [2]       |
| Common dab  | 1990's                                                                                                     | 0.60-0.70                                                                                                  | Irish observer data from beam trawl fisheries                       | [8, 5]    |
| Common dab  | 2005-2007                                                                                                  | 0.838                                                                                                      | Summary for beam trawl fisheries                                    | [3]       |
| Common dab  | 2008-2008                                                                                                  | 0.866 (beam trawl); 0.594-0.818 (otter trawl depending on cod-end mesh)                                    | Germany, observer data                                              | [4]       |
| Common sole | 1999 – 2007                                                                                                | 0                                                                                                          | England & Wales TRIO observer database                              | [1]       |
| Common sole | 1976-79, 1980-1983, 1989-1990, 1999, 2000, 2001, 2002, 2003, 2004, 2005, 2006, 2007, 2008                  | 0.04, 0.15, 0.20, 0.05, 0.10, 0.06, 0.13, 0.14, 0.17, 0.11, 0.13, 0.10, 0.06                               | Netherlands observer database                                       | [6]       |
| Common sole | 1978, 1979, 1980, 1981, 1982, 1983, 1989, 1990, 1999, 2000, 2001, 2002, 2003, 2004, 2005, 2006, 2007, 2008 | 0.03, 0.03, 0.09, 0.09, 0.09, 0.09, 0.13, 0.11, 0.08, 0.08, 0.08, 0.13, 0.14, 0.17, 0.11, 0.13, 0.10, 0.06 | Netherlands beam trawl fishery data compiled for ICES Assessment WG | [9]       |
| Common sole | 2003 – 2006                                                                                                | 0.20 (by numbers)                                                                                          | England & Wales observer data                                       | [7]       |
| Common sole | 2010                                                                                                       | 0.275                                                                                                      | Denmark, North Sea, observer data                                   | [2]       |

|             |                 |                                                                                                                                                                  |                                               |      |
|-------------|-----------------|------------------------------------------------------------------------------------------------------------------------------------------------------------------|-----------------------------------------------|------|
| Common sole | 2005-2007       | 0.122                                                                                                                                                            | Summary for beam trawl fisheries              | [3]  |
| Common sole | 2002-2008       | 0.076 (beam trawl); 0.058 (otter trawl)                                                                                                                          | Germany, observer data                        | [4]  |
| Flounder    | 1999 – 2007     | 0.954                                                                                                                                                            | England & Wales TRIO observer database        | [1]  |
| Flounder    | 2010            | 0                                                                                                                                                                | Denmark, North Sea & Skagerrak, observer data | [2]  |
| Flounder    | 2005-2007       | 0.448                                                                                                                                                            | Summary for beam trawl fisheries              | [3]  |
| Flounder    | 2002-2008       | 0.119 (beam trawl)                                                                                                                                               | Germany, observer data                        | [4]  |
| Gurnards    | 1999 – 2007     | 0.899                                                                                                                                                            | England & Wales TRIO observer database        | [1]  |
| Gurnards    | 1980's – 2000's | >0.95                                                                                                                                                            | Summary by WG                                 | [5]  |
| Gurnards    | 2003 – 2006     | 0.74 (by numbers)                                                                                                                                                | England & Wales observer data                 | [7]  |
| Gurnards    | 2010            | 0.911                                                                                                                                                            | Denmark, North Sea & Skagerrak, observer data | [2]  |
| Gurnards    | 2005-2007       | 0.976 (grey gurnard); 0.632 (red gurnard)                                                                                                                        | Summary for beam trawl fisheries              | [3]  |
| Gurnards    | 2002-2008       | 0.364 (tub gurnard, beam); 0.295 (tub gurnard, otter trawl); 0.930 (grey gurnard, beam trawl); 0.766-0.863 (grey gurnard, otter trawl depending on cod end mesh) | Germany, observer data                        | [4]  |
| Hake        | 1999 – 2007     | 0.220                                                                                                                                                            | England & Wales TRIO observer database        | [1]  |
| Hake        | 2010            | 0.182                                                                                                                                                            | Denmark, North Sea & Skagerrak, observer data | [2]  |
| Hake        | 2002-2008       | 0 - 0.002 (otter trawl, depending on mesh size)                                                                                                                  | Germany, observer data                        | [4]  |
| Halibut     | 1999 – 2007     | 0                                                                                                                                                                | England & Wales TRIO observer database        | [1]  |
| Halibut     | 2010            | 0.219                                                                                                                                                            | Denmark, North Sea & Skagerrak, observer data | [2]  |
| Lemon sole  | 1999 – 2007     | 0.293                                                                                                                                                            | England & Wales TRIO observer database        | [7]  |
| Lemon sole  | 2003 – 2006     | 0.39 (by numbers)                                                                                                                                                | England & Wales observer data                 | [7]  |
| Lemon sole  | 2010            | 0.041                                                                                                                                                            | Denmark, North Sea & Skagerrak, observer data | [2]  |
| Lemon sole  | 2005-2007       | 0.164                                                                                                                                                            | Summary for beam trawl fisheries              | [3]  |
| Lemon sole  | 2002-2008       | 0.732 (beam trawl); 0.025-0.347 (otter trawl depending on cod end mesh)                                                                                          | Germany, observer data                        | [4]  |
| Ling        | 2010            | 0.13                                                                                                                                                             | Denmark, North Sea & Skagerrak, observer data | [2]  |
| Ling        | 2002-2008       | 0.003                                                                                                                                                            | Germany, observer data                        | [4]  |
| Megrim      | 1999 – 2007     | 0.339                                                                                                                                                            | England & Wales TRIO observer database        | [1]  |
| Megrim      | 2006-2008       | 0.05                                                                                                                                                             | Scottish data, northern North Sea             | [10] |
| Mulletts    | 2000's          | 0                                                                                                                                                                | Summary by WG                                 | [5]  |
| Mulletts    | 2010            | 0                                                                                                                                                                | Denmark, North Sea & Skagerrak, observer data | [2]  |

|                     |                 |                                                                          |                                                                                   |      |
|---------------------|-----------------|--------------------------------------------------------------------------|-----------------------------------------------------------------------------------|------|
| Pollack             | 2010            | 0.003                                                                    | Denmark, North Sea & Skagerrak, observer data                                     | [2]  |
| Pollack             | 2002-2008       | 0.001 (otter trawl)                                                      | Germany, observer data                                                            | [4]  |
| Rays and skates     | 1999 – 2007     | 0.025                                                                    | England & Wales TRIO observer database                                            | [1]  |
| Rays and skates     | 2003 – 2006     | 0.51 – 0.56 (by numbers)                                                 | England & Wales observer data                                                     | [7]  |
| Rays and skates     | 2010            | 0                                                                        | Denmark, North Sea & Skagerrak, observer data                                     | [2]  |
| Rays and skates     | 2002-2008       | 0.743 (beam trawl); 0.9,21-0.985 (otter trawl depending on cod end mesh) | Germany, observer data                                                            | [4]  |
| Saithe              | 1999 – 2007     | 0.328                                                                    | England & Wales TRIO observer database                                            | [1]  |
| Saithe              | 2003 – 2006     | 0.28 (by numbers)                                                        | England & Wales observer data                                                     | [7]  |
| Saithe              | 2010            | 0.021                                                                    | Denmark, North Sea & Skagerrak, observer data                                     | [2]  |
| Saithe              | 2002-2008       | 0.001 (otter trawl)                                                      | Germany, observer data                                                            | [4]  |
| Saithe              | 2009-2011       | <0.05 (otter trawl)                                                      | French and German fleets in the northern North Sea                                | [11] |
| Small sharks        | 1999 – 2007     | 0                                                                        | England & Wales TRIO observer database                                            | [1]  |
| Spurdog             | 1999 – 2007     | 0.015                                                                    | England & Wales TRIO observer database                                            | [1]  |
| Spurdog             | 2010            | 0.64                                                                     | Denmark, North Sea & Skagerrak, observer data                                     | [2]  |
| Turbot              | 1999 – 2007     | 0.167 (turbot and brill combined)                                        | England & Wales TRIO observer database                                            | [1]  |
| Turbot              | 1980's – 2000's | 0.024 (turbot and brill combined)                                        | Summary by WG                                                                     | [5]  |
| Turbot              | 2010            | 0                                                                        | Denmark, North Sea & Skagerrak, observer data                                     | [2]  |
| Turbot              | 2005-2007       | 0.005                                                                    | Summary for beam trawl fisheries                                                  | [3]  |
| Turbot              | 2002-2008       | 0.013 (beam trawl); 0-0.02 (otter trawl depending on cod end mesh)       | Germany, observer data                                                            | [4]  |
| Tusk                | 2010            | 0                                                                        | Denmark, North Sea & Skagerrak, observer data                                     | [2]  |
| Witch               | 1999 – 2007     | 0.750                                                                    | England & Wales TRIO observer database                                            | [1]  |
| Witch               | 2010            | 0.173                                                                    | Denmark, North Sea & Skagerrak, observer data                                     | [2]  |
| Wolffish            | 1999 – 2007     | 0                                                                        | England & Wales TRIO observer database                                            | [1]  |
| Wolffish            | 2010            | 0.002                                                                    | Denmark, North Sea & Skagerrak, observer data                                     | [2]  |
| Wolffish            | 2002-2008       | 0.001                                                                    | Germany, observer data                                                            | [4]  |
| Other gadoids       | 1999 – 2007     | 0.059                                                                    | England & Wales TRIO observer database                                            | [1]  |
| Other demersal fish | 1999 – 2007     | 0.007                                                                    | England & Wales TRIO observer database                                            | [1]  |
| Other demersal fish | 2003 – 2006     | 0.66 (by numbers)                                                        | England & Wales observer data                                                     | [7]  |
| Other marketable    | 2010            | 0.944                                                                    | Grenadier, Long rough dab, Lumpfish, Rabbitfish, Rocklings, Velvet belly, Weevers | [2]  |
| Other marketable    | 1999 – 2007     | 1                                                                        | Long rough dab                                                                    | [1]  |

|                        |             |                                        |                                                                               |     |
|------------------------|-------------|----------------------------------------|-------------------------------------------------------------------------------|-----|
| Other marketable       | 2002-2008   | 0.973 (bib, long rough dab, solenette) | Germany, observer data                                                        | [4] |
| Major targeted pelagic | 2010        | 0.991                                  | Herring, Horse mackerel, Mackerel, Blue whiting, Norway pout, Sprat           | [2] |
| Major targeted pelagic | 1999-2007   | 0.535                                  | Herring, Horse mackerel, Mackerel, Blue whiting, Norway pout, sandeels, Sprat | [1] |
| Major targeted pelagic | 2002-2008   | 0.715 (Mackerel, Horse mackerel)       | Germany, observer data                                                        | [4] |
| Minor targeted pelagic | 2010        | 1                                      | European anchovy                                                              | [2] |
| By-catch pelagic       | 2010        | 0.971                                  | Argentines, Redfish                                                           | [2] |
| Discard only           | 2010        | 1                                      | Hooknose                                                                      | [2] |
| Discard only           | 1999 – 2007 | 1                                      | Dragonet                                                                      | [1] |

Data for common sole are also listed even though this is a reference species, since the ICES approved data on discard rates are based entirely on observer data from the Netherlands observer programme, whilst other less extensive data exist. Proportions discarded are either averages over a period of years where a single value is given, or annual values where multiple figures are listed.

### References for Table S3

1. Mackinson S, Daskalov G (2007) An ecosystem model of the North Sea to support an ecosystem approach to fisheries management: description and parameterisation. *Scientific Series Technical Report 142*, Cefas Lowestoft, 195pp.
2. Storr-Paulsen M, Håkansson KB, Egekvist J, Degel H, Dalskov J (2012) Danish sampling of commercial fishery. Overview with special attention to discards 2010 data. DTU Aqua Report 250-2012, 86pp.
3. European Commission (2011) Studies in the Field of the Common Fisheries Policy and Maritime Affairs. Lot 4: Impact Assessment Studies related to the CFP. Impact Assessment of Discard Reducing Policies. EU Discards Annex. Project no: ZF0926\_S10. 71pp.
4. Ulleweit J, Stransky C, Panten K (2010) Discards and discarding practices in German fisheries in the North Sea and Northeast Atlantic during 2008-2008. *Journal of Applied Ichthyology* 26: 54-66.
5. ICES (2010) Report of the Working Group on Assessment of New MoU species (WGNEW). ICES Advisory Committee, ICES CM 2010/ACOM:21, 603pp.
6. Röckmann C, Quirijns F, van Overzee H, Uhlmann S (2011). Discards in fisheries – a summary of three decades of research at IMARES and LEI. IMARES Report C068/11, 41pp.
7. Enever R, Revill AS, Grant A (2009) Discarding in the North Sea and on the historical efficacy of gear-based technical measures in reducing discards. *Fisheries Research* 95: 40–46.
8. Borges L, Rogan E, Officer R (2005) Discarding by the demersal fishery in the waters around Ireland. *Fisheries Research* 76: 1-13.

9. ICES (2012) Report of the Working Group on the Assessment of Demersal Stocks in the North Sea and Skagerrak (WGNSSK). ICES Advisory Committee, ICES CM 2012/ACOM:13, 1383pp. - North Sea sole assessment data p555-608
10. ICES (2012) Report of the Working Group for the Celtic Seas Ecoregion (WGCSE). ICES Advisory Committee, ICES CM 2012/ACOM:12, 1750pp.
11. ICES (2012) Report of the Working Group on the Assessment of Demersal Stocks in the North Sea and Skagerrak (WGNSSK). ICES Advisory Committee, ICES CM 2012/ACOM:13, 1383pp. – North Sea saithe assessment data p609-670
