# Supplementary material for: Hind-Casting the Quantity and Composition of Discards by Mixed Demersal Fisheries in the North Sea
Source: PLOS journal article supplement (doi:10.1371/journal.pone.0117078), 2015-03-16
Supplement: S11 (10.1371/journal.pone.0117078.s011) [file journal.pone.0117078.s011]

**TABLE S5.** Retention length selectivity parameters (eq. 14 in the main paper) derived from data presented in papers and working group reports.

| Species      | Area & year              | Gear                           | Retention selectivity parameters $RL_{50}$ , $RI$ | Literature source |
|--------------|--------------------------|--------------------------------|---------------------------------------------------|-------------------|
| Cod          | North Sea, 2005          | Otter trawl                    | 38, 17                                            | [1]               |
| Cod          | North Sea, 2005          | Beam trawl                     | 35, 3                                             | [1]               |
| Cod          | NE Atlantic, 2005        | Otter trawl                    | 33, 6                                             | [1]               |
| Cod          | NE Atlantic, 2005        | Pair trawl                     | 33, 6                                             | [1]               |
| Cod          | NE Atlantic, 2005        | Seine                          | 38, 11                                            | [1]               |
| Haddock      | North Sea, 2005          | Otter trawl                    | 32, 7                                             | [1]               |
| Haddock      | NE Atlantic, 2005        | Otter trawl                    | 32, 11                                            | [1]               |
| Haddock      | NE Atlantic, 2005        | Pair trawl                     | 33, 10                                            | [1]               |
| Haddock      | NE Atlantic, 2005        | Seine                          | 32, 11                                            | [1]               |
| Hake         | North Sea, 2005          | Otter trawl                    | 33, 8                                             | [1]               |
| Plaice       | North Sea, 2005          | Otter trawl                    | 27, 5                                             | [1]               |
| Plaice       | North Sea, 2005          | Beam trawl                     | 26, 4                                             | [1]               |
| Saithe       | NE Atlantic, 2005        | Otter trawl                    | 44, 18                                            | [1]               |
| Saithe       | NE Atlantic, 2005        | Pair trawl                     | 48, 15                                            | [1]               |
| Saithe       | NE Atlantic, 2005        | Seine                          | 54, 18                                            | [1]               |
| Sole         | North Sea, 2005          | Otter trawl                    | 29, 16                                            | [1]               |
| Sole         | North Sea, 2005          | Beam trawl                     | 24, 7                                             | [1]               |
| Whiting      | North Sea, 2005          | Otter trawl                    | 27, 5                                             | [1]               |
| Whiting      | NE Atlantic, 2005        | Otter trawl, Pair trawl, seine | 32, 13                                            | [1]               |
| Whiting      | North Sea                | Nephrops Trawl                 | 25, 6                                             | [2]               |
| Grey gurnard | Irish Sea, 2005          | Otter trawl                    | 30, 6.6                                           | [3]               |
| Grey gurnard | Celtic Sea, 2005         | Otter trawl                    | 36, 2.2                                           | [3]               |
| Tub gurnard  | English Channel, 2005    | Otter trawl                    | 25, 3.3                                           | [3]               |
| Dab          | North Sea, 2007          | Otter trawl                    | 25.5, 3.3                                         | [3]               |
| Dab          | North Sea, 2008          | Otter trawl                    | 24.5, 0.55                                        | [3]               |
| Dab          | North Sea, 2009          | Otter trawl                    | 26.5, 0.88                                        | [3]               |
| Dab          | North Sea, 2007          | Beam trawl                     | 24.0, 1.0                                         | [3]               |
| Dab          | North Sea, 2008          | Beam trawl                     | 23.5, 1.5                                         | [3]               |
| Dab          | North Sea, 2009          | Beam trawl                     | 25, 1.9                                           | [3]               |
| Turbot       | Irish & Celtic Sea, 2005 | Beam trawl                     | 29.5, 0.4                                         | [3]               |
| Brill        | Irish & Celtic Sea, 2005 | Beam trawl                     | 29.5, 1.8                                         | [3]               |

$RL_{50}$  refers to the length at 50% retention aboard fishing vessels;  $RI$  refers to the selection interval.

### References for Table S5

1. European Commission (2006) Commission staff working paper report of the Scientific, Technical, and Economic Committee for Fisheries. Discards from community vessels: opinion expressed during a plenary meeting held in Ispra from 6–10 November 2006. 56 pp. <http://stecf.jrc.ec.europa.eu/reports>.
2. Catchpole TL, Frid CLJ, Gray TS (2006) Resolving the discard problem — A case study of the English *Nephrops* fishery. *Marine Policy* 30: 821–831.
3. ICES (2010) Report of the Working Group on Assessment of New MoU species (WGNEW). ICES Advisory Committee, ICES CM 2010/ACOM:21, 603pp.
